# Supplementary material
Source: PubMed Central journal article supplement (PMC4856476)
Supplement: NIHMS780769-supplement-SI.pdf [file NIHMS780769-supplement-SI.pdf]

## Supporting Information

# Biophysical Influence of Airborne Carbon Nanomaterials on Natural Pulmonary Surfactant

*Russell P. Valle,<sup>1</sup> Tony Wu,<sup>1</sup> and Yi Y. Zuo<sup>1,2\*</sup>*

1. Department of Mechanical Engineering, University of Hawaii at Manoa, Honolulu, Hawaii  
96822, USA

2. Department of Pediatrics, John A. Burns School of Medicine, University of Hawaii, Honolulu,  
Hawaii, 96826, USA

### **\* Corresponding Author**

Mailing Address: 2540 Dole St, Holmes Hall 302, Honolulu, HI, 96822, USA. Phone: 808-956-9650; fax: 808-956-2373; E-mail: yzuo@hawaii.edu.

## List of Supporting Figures and Tables

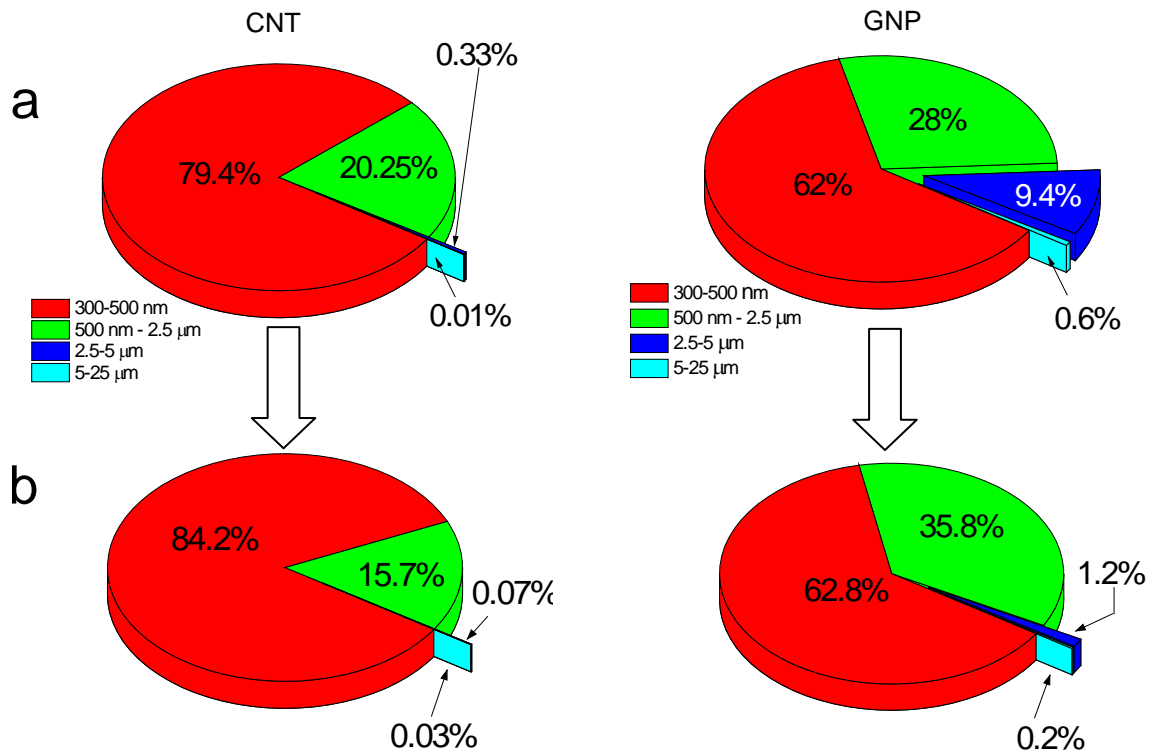

**Figure S1.** Size distributions of carbon nanomaterial (CNM) aerosols right after insufflation (a) and settling for 30 min after insufflation (b). For both carbon nanotubes (CNT) and graphene nanoplatelets (GNP), there are higher percentages of aerosols smaller than 2.5 μm after 30 min settling time than the initial insufflation.

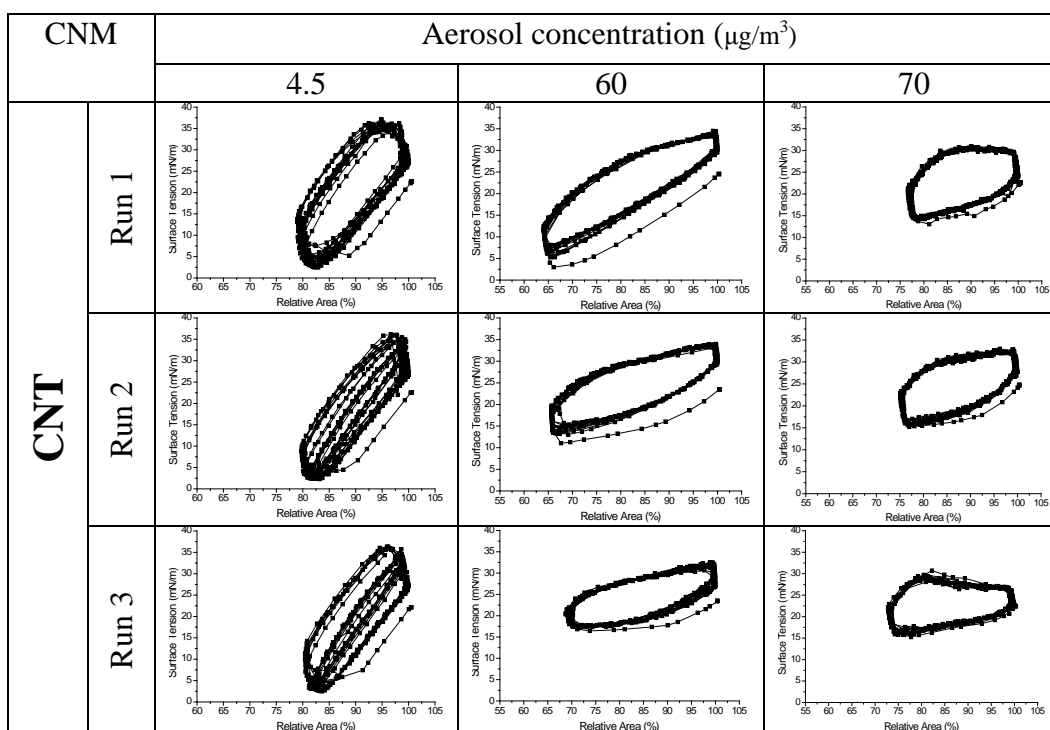

**Figure S2.** Reproducibility of dynamic cycling of Infasurf exposed to CNT aerosols. An Infasurf droplet was exposed to the CDS chamber containing 4.5, 60, and 70  $\mu\text{g}/\text{m}^3$  of airborne CNT. Quantitative analysis of surfactant inhibition, including  $\gamma_{\min}$ ,  $\gamma_{\max}$ ,  $\kappa_{\text{comp}}$ , and  $\kappa_{\text{exp}}$  shown in Fig. 4, was determined from these dynamic cycling data.

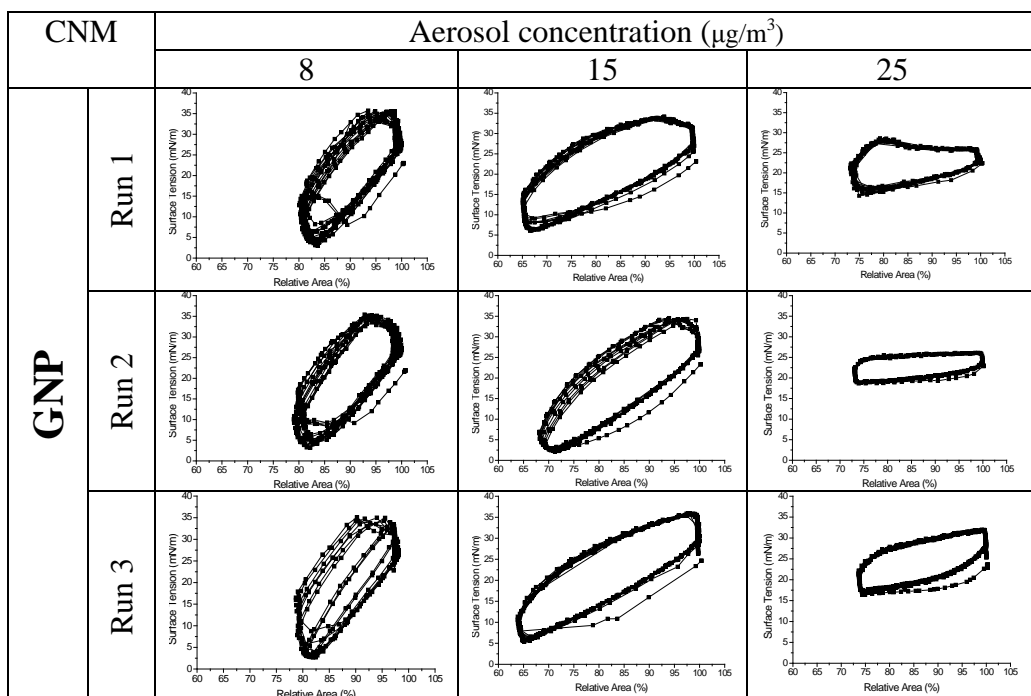

**Figure S3.** Reproducibility of dynamic cycling of Infasurf exposed to GNP aerosols. An Infasurf droplet was exposed to the CDS chamber containing 8, 15, and 25  $\mu\text{g}/\text{m}^3$  of airborne GNP. Quantitative analysis of surfactant inhibition, including  $\gamma_{\min}$ ,  $\gamma_{\max}$ ,  $\kappa_{\text{comp}}$ , and  $\kappa_{\text{exp}}$  shown in Fig. 4, was determined from these dynamic cycling data.

|         |                                                                                     | 50×50 μm                                                                             | 20×20 μm                                                                              |
|---------|-------------------------------------------------------------------------------------|--------------------------------------------------------------------------------------|---------------------------------------------------------------------------------------|
| Lateral |                                                                                     | 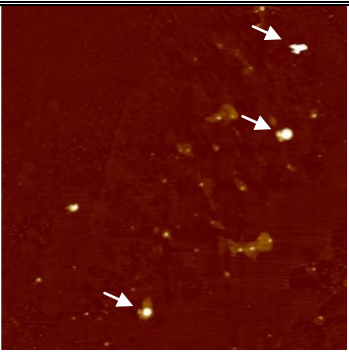   |    |
| 3-D     |                                                                                     |    |    |
|         | 100×100 μm                                                                          | 50×50 μm                                                                             | 10×10 μm                                                                              |
| Lateral |  |  |  |
| 3-D     |  |  |  |

**Figure S4.** Additional AFM images of the Infasurf film exposed to CNT. Low and high resolution images show multiple particles per image noted by arrows. 3D images are given beneath each lateral structure image to give a contrast perspective of the height difference.

|         | 100×100 μm                                                                        | 20×20 μm                                                                             |
|---------|-----------------------------------------------------------------------------------|--------------------------------------------------------------------------------------|
| Lateral | 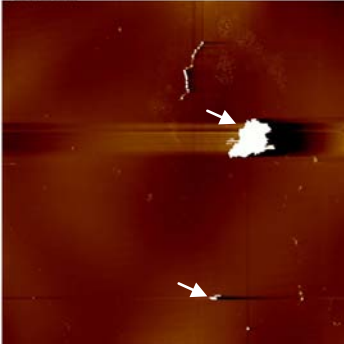 |    |
| 3-D     |  |    |
|         |                                                                                   | 10×10 μm                                                                             |
| Lateral |                                                                                   |   |
| 3-D     |                                                                                   |  |

**Figure S5.** Additional AFM images of the Infasurf film exposed to GNP. Images show two positions where GNP particles were found. Both have similar morphology and heights of 1-1.5 μm. The low resolution image shows multiple particles noted by white arrows. 3D images are given beneath each lateral structure image to give a contrast perspective of the height difference.

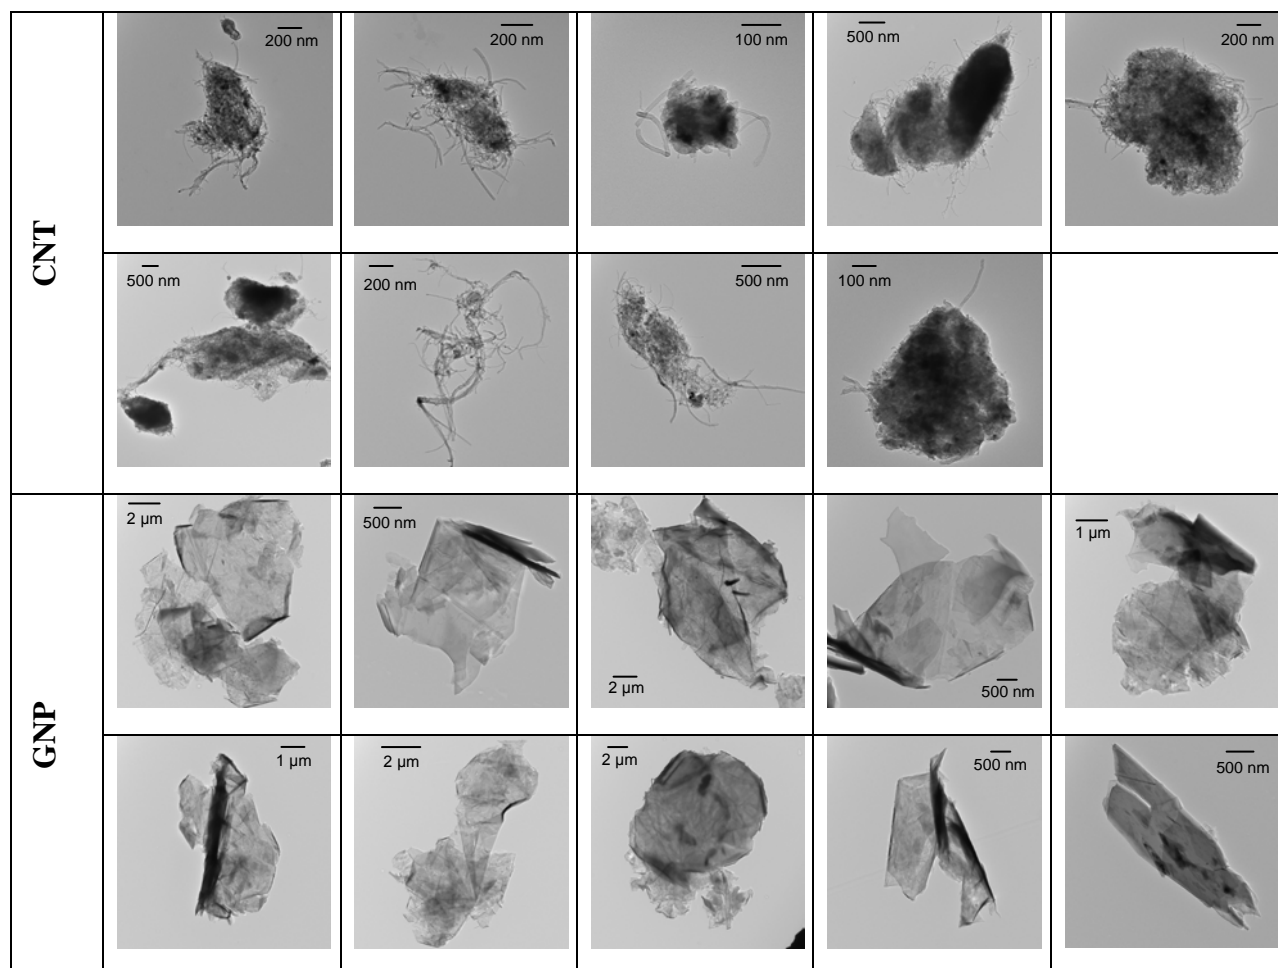

**Figure S6.** Additional TEM images for CNT and GNP aerosols, collected from the CDS chamber.

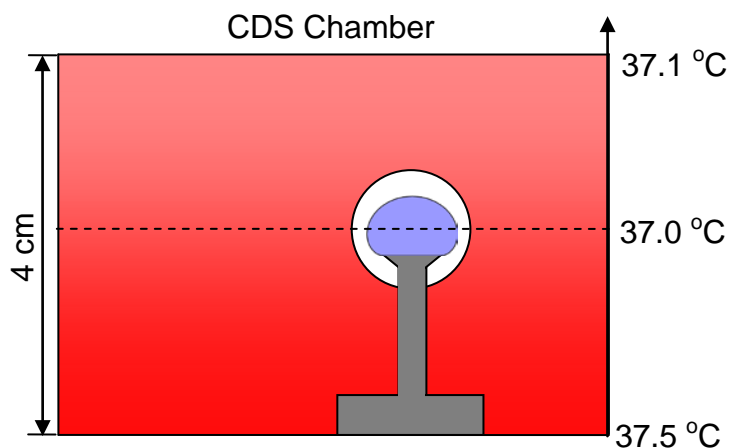

**Figure S7.** Temperature distribution within the CDS chamber.

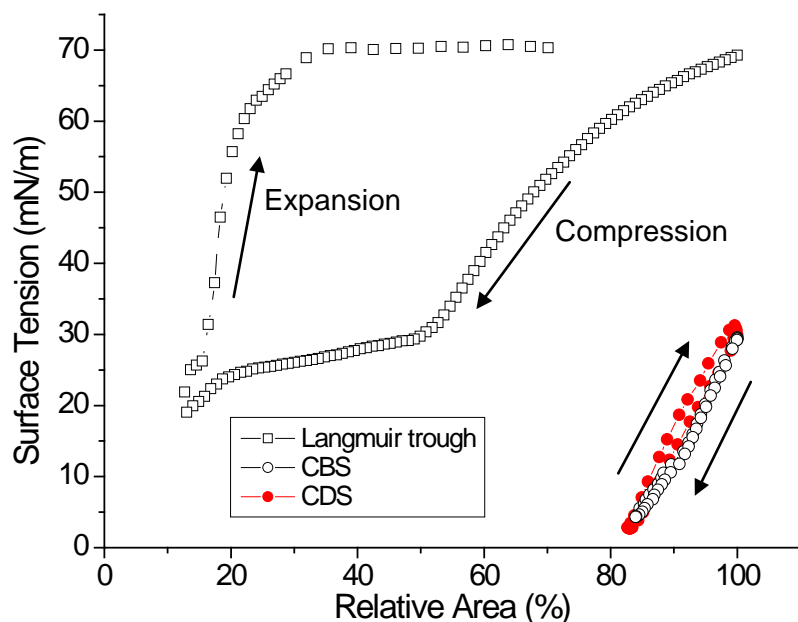

**Figure S8.** Comparison of the compression-expansion cycle of Infasurf recorded by the classical Langmuir trough (at room temperature), by the CBS and the CDS (at body temperature). It can be seen that the Langmuir trough fails to mimic the biophysical properties of natural PS. The CBS has been proven to be a benchmark for simulating biophysical properties of PS. We found an excellent agreement between the CBS and the CDS, proving that the CDS is able to reproduce biophysical properties of natural PS under physiologically relevant conditions. Moreover, the CDS used a much smaller surfactant reservoir than the CBS ( $\sim 10 \mu\text{L}$  vs.  $> 1 \text{ mL}$ ). Meanwhile, design of the CDS makes it much easier than the CBS for studying airborne particles.



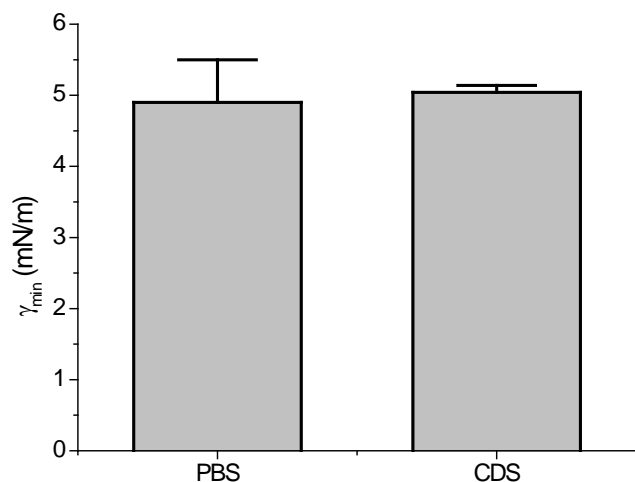

**Figure S9.** Comparison of the minimum surface tension ( $\gamma_{\min}$ ) of 1.5 mg/mL Curosurf determined under physiologically relevant conditions using the PBS (Schleh et al. *Respir. Res.* 2009, 10, 90) and the CDS. It is found that the  $\gamma_{\min}$  determined by the two *in vitro* methods is very close, i.e.,  $\sim 5$  mN/m. This low surface tension is consistent with the high surface activity of natural PS.

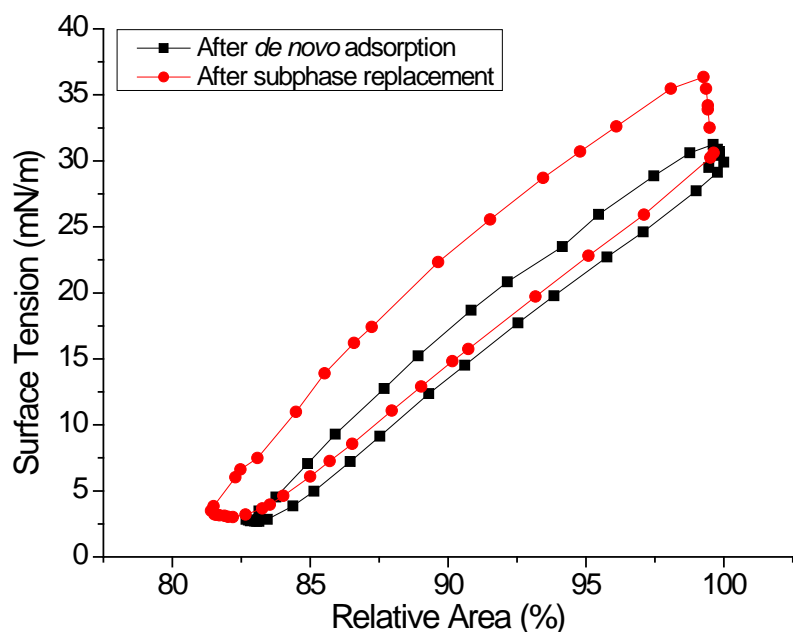

**Figure S10.** Subphase replaced Infasurf droplet biophysics showing no distinctive difference from *de novo* adsorbed film with vesicles in the subphase.

**Table S1.** Following the literature we used the following calculation to convert particle number concentration to mass concentration:  $C=N \times (4/3)\pi r^3 \times \rho \times V^{-1}$ , where C is the mass concentration, N is the particle count, r is the average of size range, ρ is the particle density, and V is the total volume of the CDS chamber. The table outlines the mass contributions from three particle size ranges, measured with the laser diffraction spectroscopy.

|     | Exposure Level | Trial | Particle Count |                           |                       |                      | Mass Concentration Contribution ( $\mu\text{g}/\text{m}^3$ ) |                            |                       |                      |
|-----|----------------|-------|----------------|---------------------------|-----------------------|----------------------|--------------------------------------------------------------|----------------------------|-----------------------|----------------------|
|     |                |       | 300nm - 500 nm | 500 nm- 2.5 $\mu\text{m}$ | 2.5 - 5 $\mu\text{m}$ | 5 - 25 $\mu\text{m}$ | 300 nm -500 nm                                               | 500 nm - 2.5 $\mu\text{m}$ | 2.5 - 5 $\mu\text{m}$ | 5 - 25 $\mu\text{m}$ |
| CNT | Low            | 1     | 191058         | 38171                     | 1875                  | 83                   | 4.1                                                          | 38                         | 33                    | 93                   |
|     |                | 2     | 224837         | 44914                     | 5327                  | 241                  | 4.9                                                          | 45                         | 93                    | 271                  |
|     |                | 3     | 208851         | 41720                     | 3526                  | 1412                 | 4.5                                                          | 42                         | 62                    | 1587                 |
|     | Moderate       | 1     | 3358589        | 670912                    | 7731                  | 2481                 | 73                                                           | 680                        | 135                   | 638                  |
|     |                | 2     | 2210592        | 441588                    | 7304                  | 1570                 | 48                                                           | 447                        | 128                   | 1765                 |
|     |                | 3     | 2526103        | 504615                    | 1215                  | 543                  | 55                                                           | 511                        | 21                    | 139                  |
|     | High           | 1     | 2285104        | 456473                    | 1095                  | 695                  | 50                                                           | 462                        | 19                    | 781                  |
|     |                | 2     | 3766302        | 752357                    | 1545                  | 187                  | 82                                                           | 762                        | 27                    | 48                   |
|     |                | 3     | 3634564        | 726041                    | 4878                  | 3277                 | 79                                                           | 735                        | 85                    | 3685                 |
| GNP | Low            | 1     | 441803         | 238940                    | 19737                 | 4124                 | 9.2                                                          | 277                        | 346                   | 4637                 |
|     |                | 2     | 425178         | 229949                    | 16575                 | 3313                 | 8.9                                                          | 267                        | 291                   | 3725                 |
|     | Moderate       | 3     | 287896         | 155703                    | 14745                 | 3180                 | 6                                                            | 200                        | 259                   | 3576                 |
|     |                | 1     | 674253         | 364657                    | 29723                 | 4614                 | 14                                                           | 844                        | 522                   | 5188                 |
|     |                | 2     | 718141         | 388393                    | 34175                 | 5551                 | 15                                                           | 899                        | 600                   | 6246                 |
|     | High           | 3     | 924058         | 499760                    | 35188                 | 6426                 | 19                                                           | 581                        | 618                   | 7226                 |
|     |                | 1     | 974891         | 527252                    | 33256                 | 9604                 | 20                                                           | 613                        | 584                   | 10800                |
|     |                | 2     | 1499618        | 811040                    | 1396                  | 1551                 | 31                                                           | 943                        | 24                    | 1744                 |
|     |                | 3     | 968330         | 523703                    | 38601                 | 9938                 | 20                                                           | 609                        | 678                   | 11175                |

## List of Supporting Video Clips

**Video 1.** Ambient air cycling. Infasurf droplet exposed to ambient air under compression and expansion cycling. Notice the droplet shape deformation to a flatter, non-spherical shape which correlates to lower surface tension.

**Video 2.** CNT exposure cycling. Infasurf droplet exposed to CNT under compression and expansion cycling. Notice the lack of shape deformation to a flatter, non-spherical shape which correlates with a lack of surface tension reduction, *i.e.* surfactant inhibition.

**Video 3.** GNP exposure cycling. Infasurf droplet exposed to GNP under compression and expansion cycling. Notice the lack of shape deformation to a flatter, non-spherical shape which correlates with a lack of surface tension reduction, *i.e.* surfactant inhibition.
